# Supplementary material for: Facile synthesis of S, N co-doped carbon dots and investigation of their photoluminescence properties
Source: Royal Society of Chemistry journal article supplement (doi:10.1039/c5cp03498a), 2015-01-01
Supplement: c5cp03498a1.pdf [file c5cp03498a1.pdf]

## Electronic Supporting Information (ESI)

### Facile synthesis of S, N co-doped carbon dots and their photoluminescence properties investigation

Yue Zhang, Junhui He\*

Functional Nanomaterials Laboratory, Center for Micro/Nanomaterials and Technology, and Key Laboratory of Photochemical Conversion and Optoelectronic Materials, Technical Institute of Physics and Chemistry, Chinese Academy of Sciences, Zhongguancundonglu 29, Haidianqu, Beijing 100190, China.

\* Corresponding author. Fax: +86 10 82543535. E-mail address: jhhe@mail.ipc.ac.cn.

The fluorescence quantum yield of the CDs was estimated using quinine sulphate solution in 0.1 M sulphuric acid (quantum yield 54%) as a reference (See Fig. S1).

The following equation was used to calculate the CDs quantum yield:

$$Y_{CD} = Y_{QS} * \frac{\frac{F_{CD}}{A_{CD}}}{\frac{F_{QS}}{A_{QS}}}$$

where  $Y_{CD}$  and  $Y_{QS}$  are the quantum yields of CDs and quinine sulfate;  $F_{CD}$  and  $F_{QS}$  are defined as the photoluminescence integrals of CDs and quinine sulfate.  $A_{CD}$  and  $A_{QS}$  represent the absorbance of CDs and quinine sulfate.

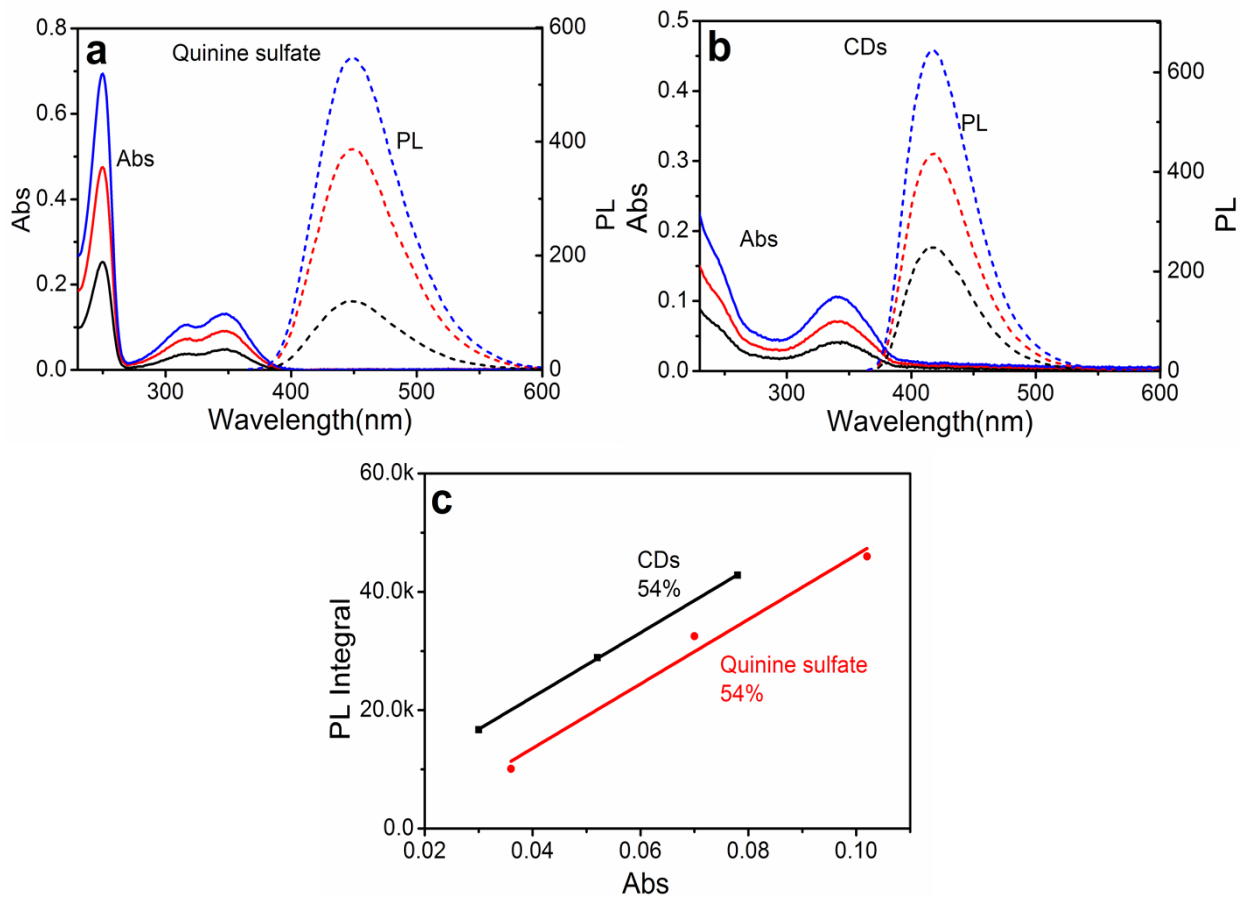

Fig. S1 Quantum yield measurement of CDs. (a-b) Absorption and emission spectra for Quinine sulfate and CDs. (c) linear relationship between Abs and PL integral for CDs and Quinine sulfate respectively.

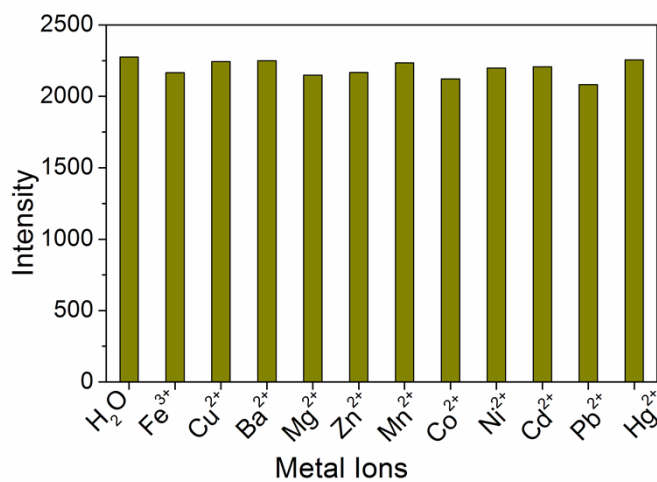

Fig. S2 Fluorescence intensities of CDs in the presence of different metal ions (100  $\mu$ M)
